# Supplementary material
Source: PubMed Central journal article supplement (PMC11589897)

- Short report -

612 **SUPPLEMENTARY FIGURE LEGENDS**

613

614 **Figure S1. Cell adhesion on human SNED1 and murine Sned1**

615 (A) Coomassie-blue-stained polyacrylamide gel showing the quality and purity of affinity-purified  
616 full-length SNED1-His.

617 (B) Murine O9-1 neural crest cells adhere to the same extent to human SNED1 and murine Sned1.  
618 Data is represented as mean  $\pm$  SD from three biological experiments. Unpaired Student's two-  
619 tailed t-test with Welch's correction was performed to test statistical significance. ns: non-  
620 significant.

621 (C) Graph showing the adhesion of immortalized embryonic fibroblast cells isolated from *Sned1*  
622 knockout mice (*Sned1*<sup>KO</sup> iMEF) on increasing concentrations of Sned1.

623

624 **Figure S2. LM2 cell adhesion on equimolar concentration of full length SNED1 and**  
625 **SNED1<sup>1-260</sup>**

626 Graph showing LM2 cell adhesion on 66.3  $\mu$ M of full length SNED1 and SNED1<sup>1-260</sup>.

627

628 **Figure S3. Purification of integrin-binding mutants of SNED1**

629 Coomassie-blue-stained polyacrylamide gels showing the quality and purity of affinity-purified  
630 His-tagged SNED1<sup>RGE</sup> (A), SNED1<sup>LAV</sup> (B), and SNED1<sup>RGE/LAV</sup> (C). The different bands  
631 correspond to different levels of glycosylation of the proteins, as previously shown (Vallet et al.,  
632 2021).

633

634 **Figure S4. The RGD motif in SNED1<sup>1-260</sup> is sufficient to mediate cell adhesion**

635 Adhesion of MDA-MB-231' LM2' breast cancer cells (A) and O9-1 neural crest cells (B) to the  
636 N-terminal fragment of SNED1 (SNED1<sup>1-260</sup>) is significantly decreased in presence of the integrin-  
637 binding cRGDfV peptide. Data is represented as mean  $\pm$  SD from three biological experiments.  
638 Unpaired Student's two-tailed t-test with Welch's correction was performed to determine  
639 statistical significance. \*p<0.05, \*\* p<0.01.

640

641

- Short report -

642 **Figure S5. Functional blocking of integrin  $\alpha 4$  does not affect breast cancer cell adhesion on**  
643 **SNED1**

644 (A) Immunoblot on total cell extract from MDA-MB-231' LM2' and O9-1 cells showing  $\alpha 4$   
645 integrin expression.

646 (B) Adhesion of MDA-MB-231' LM2' breast cancer cells to SNED1 is not altered in presence of  
647 anti- $\alpha 4$  integrin-blocking antibody. Data is represented as mean  $\pm$  SD from three biological  
648 experiments. Unpaired Student's two-tailed t-test with Welch's correction was performed to test  
649 statistical significance. ns: non-significant.

650

651 **Figure S6. Immunoblot transparency**

652 Uncropped immunoblots for  $\beta 1$  integrin,  $\alpha 5$  integrin,  $\alpha v$  integrin,  $\beta 3$  integrin, and  $\alpha 4$  integrin.

- Short report -

653 **Supplementary Table 1: List of primers**

654

| Primer                    | Sequence                                                        | Purpose                                                                                                              |
|---------------------------|-----------------------------------------------------------------|----------------------------------------------------------------------------------------------------------------------|
| BglII-KOZAK-ATG-SNED1Hs_F | 5' TCGAAGATCTGCCACCATGCGGCACGGCGTCGC 3'                         | Subcloning SNED1 into retroviral pMSCV-IRES-Hygro vector                                                             |
| HpaI-Stop-His-SNED1Hs_R   | 5'GATGTTAACTTAGTGGTGATGGTGATGATGAGATTTCTCCAGTGTCTGACTCT TACT 3' | Shuttling of SNED1-His WT, RGE, LAV, or GE/LAV) into retroviral pMSCV-IRES-Hygro vector                              |
| HpaI-Stop-FLAG-NFS_R      | 5' CCGTAACTTACTTGTCTCATCGTCTTTGTAGTCGCACTGGGGAGGCTCAC 3'        | Subcloning SNED1 <sup>1-571</sup> into retroviral pMSCV-IRES-Hygro vector with the addition of a C-terminal FLAG tag |
| HpaI-Stop-FLAG-NF_R       | 5' CCGTAACTTACTTGTCTCATCGTCTTTGTAGTCGACGCAGAGGTAGCTCCC 3'       | Subcloning SNED1 <sup>1-530</sup> into retroviral pMSCV-IRES-Hygro vector with the addition of a C-terminal FLAG tag |
| SNED1_c120a_F             | 5' CCGAGCGCGGCGAAGCCGTCACC 3'                                   | Introduction of the c120>a (pG40E) point mutation to generate SNED1 <sup>RGE</sup>                                   |
| SNED1_c120a_R             | 5' GGTGACGGCTTCGCCGCGCTCGG 3'                                   |                                                                                                                      |
| SNED1_a932c_F             | 5' GGAGGTGCCACCTGGCCGTGAACGAATGTGC 3'                           | Introduction of the a932>c (pD311A) point mutation to generate SNED1 <sup>LAV</sup>                                  |
| SNED1_a932c_R             | 5' GCACATTCGTTACGGCCAGGTGGCACCTCC 3'                            |                                                                                                                      |

655

- Short report -

656 **Supplementary Table 2: List of antibodies used for functional blocking and immunoblotting**

657

| Antibody                            | Host species | Reactivity      | Application         | Concentration used ( $\mu\text{g/mL}$ ) | Catalog #                 |
|-------------------------------------|--------------|-----------------|---------------------|-----------------------------------------|---------------------------|
| Anti- $\beta$ 1 Integrin            | Rat          | Human           | Functional blocking | 10                                      | Sigma, MABT821            |
| Anti- $\alpha$ 5 Integrin           | Rat          | Human           | Functional blocking | 10                                      | Sigma, MABT820            |
| Anti- $\alpha$ 4 Integrin           | Mouse        | Human           | Functional blocking | 10                                      | Sigma, MAB1383            |
| Anti- $\beta$ 1 Integrin            | Hamster      | Mouse           | Functional blocking | 10                                      | BD Biosciences, BDB555002 |
| Anti- $\alpha$ 5 Integrin           | Rat          | Mouse           | Functional blocking | 10                                      | Biologend, 103817         |
| Anti- $\alpha$ v $\beta$ 3 Integrin | Mouse        | Human           | Functional blocking | 10                                      | Sigma, MAB1976Z           |
| Rat IgG                             | Rat          | Isotype control | Functional blocking | 10                                      | Invitrogen, PI31903       |
| Mouse IgG                           | Mouse        | Isotype control | Functional blocking | 10                                      | Invitrogen, PI31933       |
| Hamster IgM                         | Hamster      | Isotype control | Functional blocking | 10                                      | Biologend, 401014         |
| Anti-SNED1                          | Rabbit       | Human           | Immunoblotting      | 1                                       | Naba lab                  |
| Anti-His                            | Mouse        | -               | Immunoblotting      | 1                                       | Sigma, SAB2702218         |
| Anti-FLAG                           | Rabbit       | -               | Immunoblotting      | 1                                       | Sigma, F7425              |
| Anti- $\beta$ 1 Integrin sera       | Rabbit       | Human, Mouse    | Immunoblotting      | 1:1000 dilution                         | In-house                  |
| Anti- $\alpha$ 5 Integrin           | Rabbit       | Human, Mouse    | Immunoblotting      | 0.217                                   | Abcam, AB150361           |
| Anti- $\alpha$ 4 Integrin           | Rabbit       | Human, Mouse    | Immunoblotting      | 0.5                                     | Invitrogen, MA5-27947     |
| Anti- $\alpha$ v Integrin           | Rabbit       | Human, Mouse    | Immunoblotting      | 1                                       | Invitrogen, MA5-32195     |
| Anti- $\beta$ 3 Integrin            | Rabbit       | Human, Mouse    | Immunoblotting      | 1                                       | Invitrogen, MA5-32077     |

658

## Figure S1. Cell adhesion on human SNED1 and murine Sned1

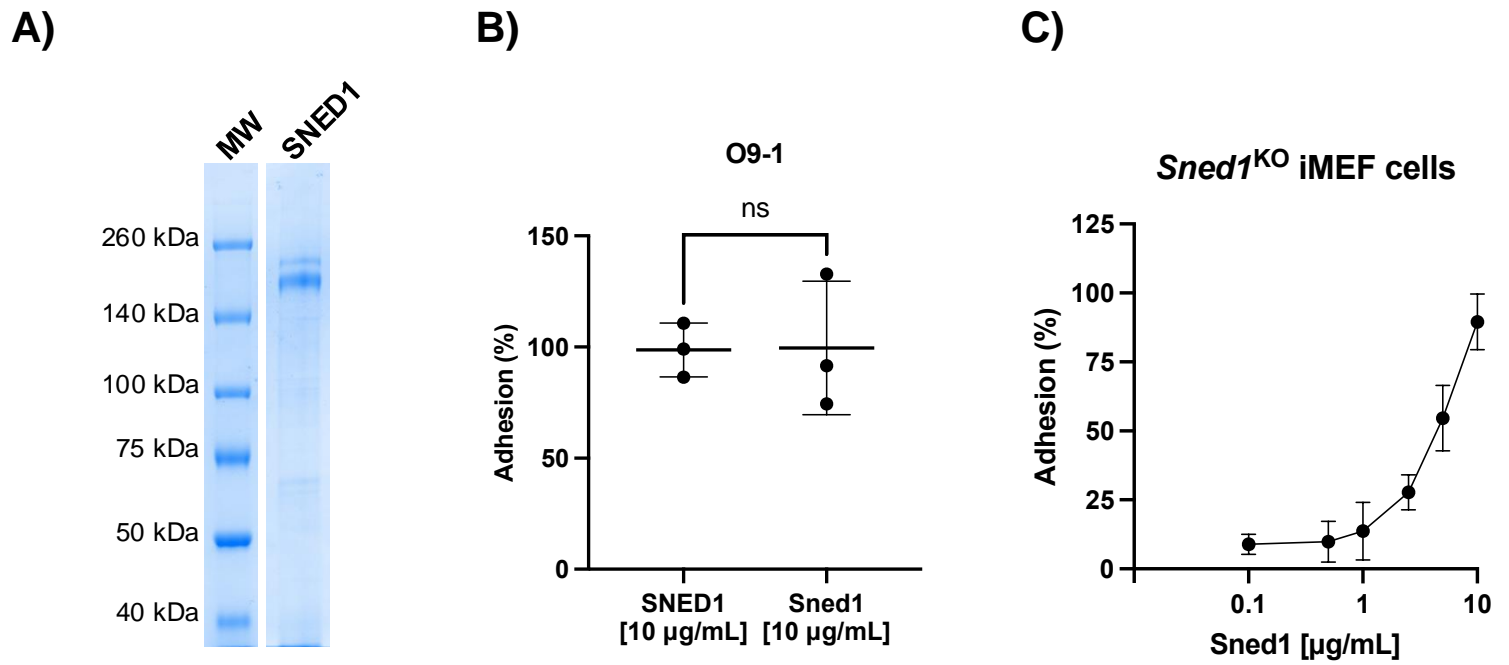

## Figure S2. LM2 cell adhesion on equal molar concentration of full length SNED1 and SNED1<sup>1-260</sup>

A)

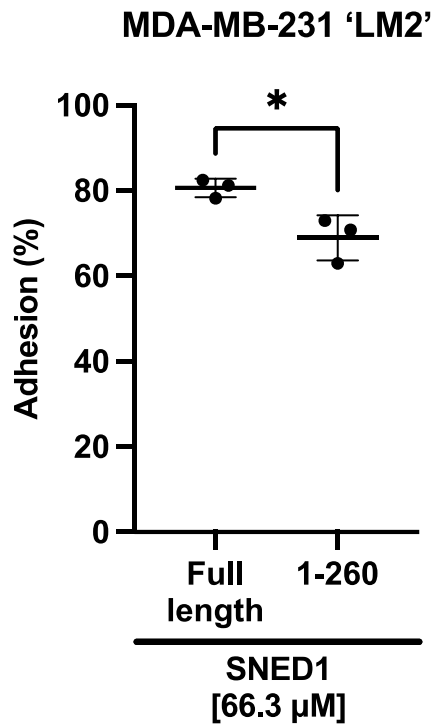

## Figure S3. Purification of integrin binding mutants of SNED1

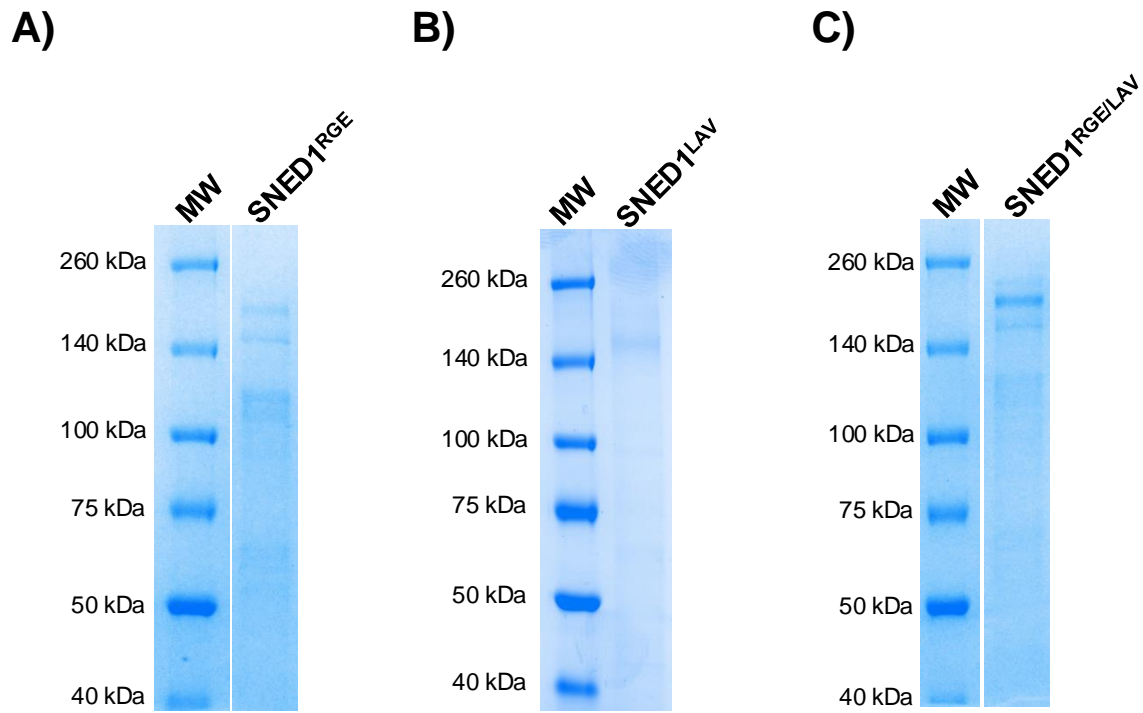

## Figure S4. The RGD motif in SNED1<sup>1-260</sup> is required for cell adhesion

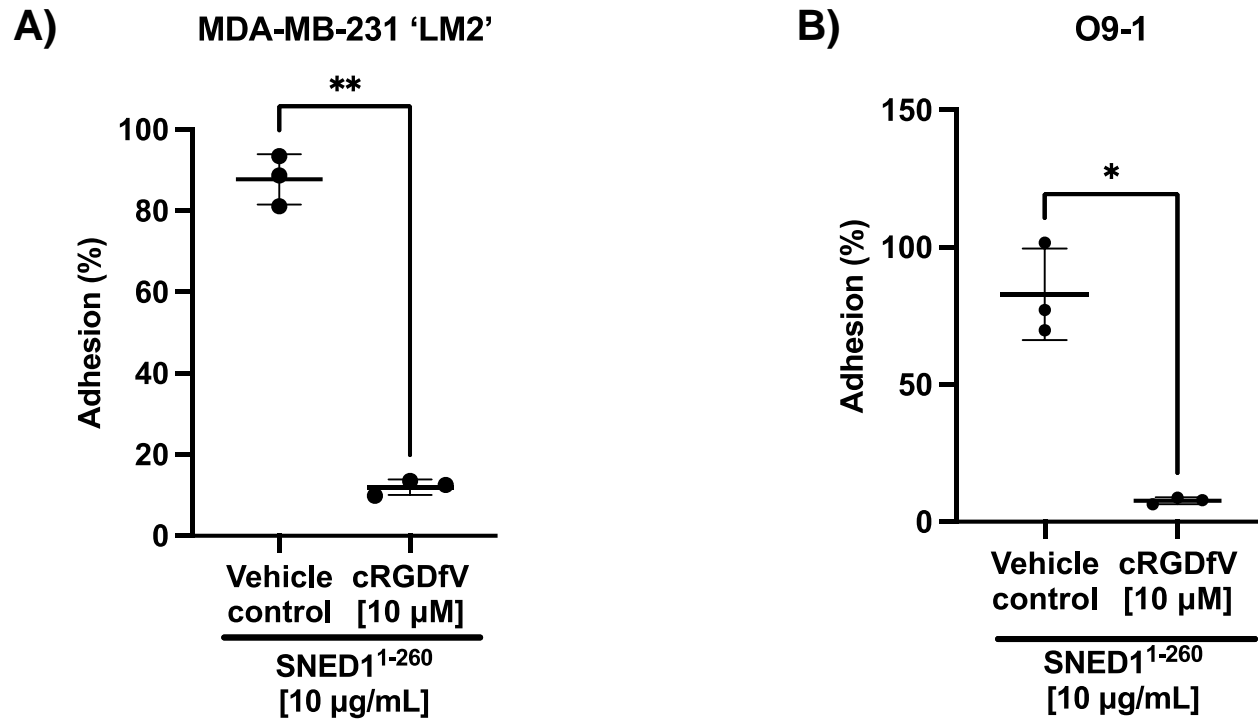



## Figure S5. Functional blocking of $\alpha 4$ integrin does **not** affect breast cancer cell adhesion to SNED1

A)

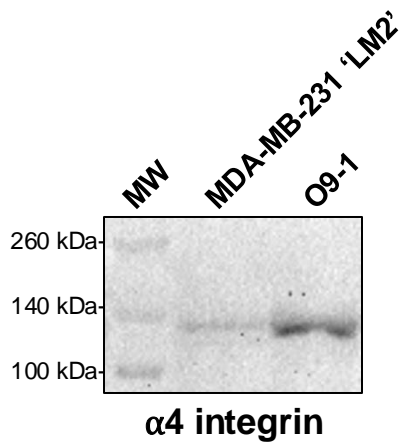

B)

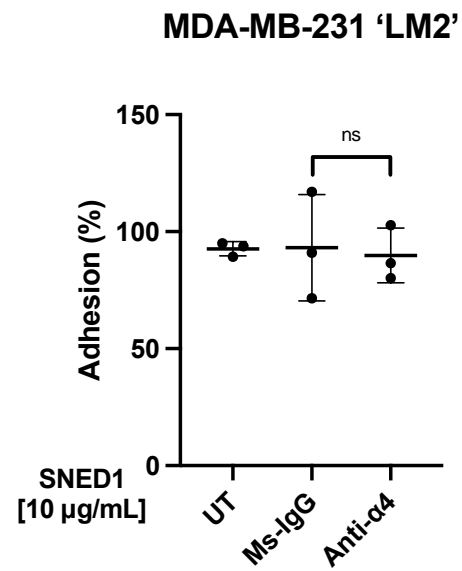

## Figure S6. Immunoblot transparency

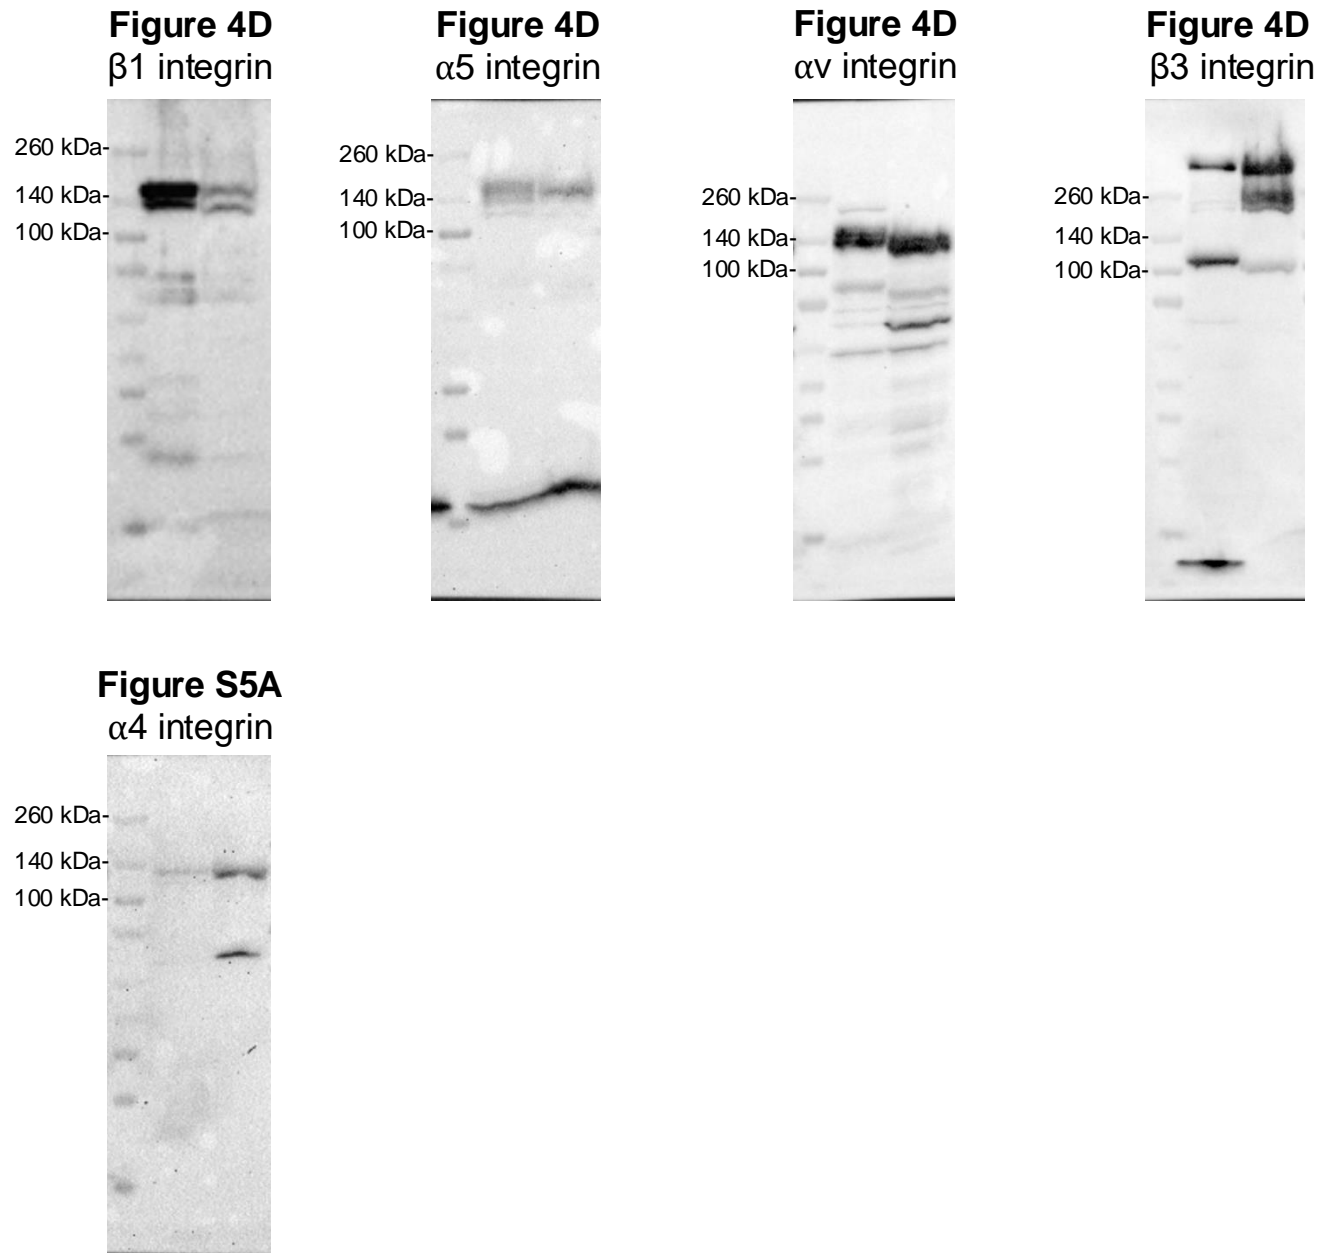

Supplement: NIHPP2024.08.07.606706v2-supplement-1.pdf [file NIHPP2024.08.07.606706v2-supplement-1.pdf]
